# Supplementary material for: Photoluminescent lanthanide(iii) coordination polymers based on 2-{[(4-methylphenyl)amino]methylene}-5,5-dimethylcyclohexane-1,3-dione
Source: Royal Society of Chemistry journal article supplement (doi:10.1039/d4nj03444a), 2024-01-01
Supplement: d4nj03444a1.pdf [file d4nj03444a1.pdf]

### Supplementary materials

#### Photoluminescent lanthanide(III) coordination polymers with 2-[[4-methylphenyl]amino]methylene}-5,5-dimethylcyclohexane-1,3-dione

Smirnova K. S., Sanzhenakova E. A., Pozdnyakov I. P., Eltsov I.V., Russkikh A.A.,  
 Dotsenko V.V., Lider E. V.\*

Table S1. Crystallographic data of the ligand and complexes.

| Identification code                         | L                                                            | 1 <sup>Eu</sup>                                                       | 2 <sup>Sm</sup>                                                       | 3 <sup>Tb</sup>                                                       | 4 <sup>Dy</sup>                                                      | 5 <sup>Gd</sup>                                                      |
|---------------------------------------------|--------------------------------------------------------------|-----------------------------------------------------------------------|-----------------------------------------------------------------------|-----------------------------------------------------------------------|----------------------------------------------------------------------|----------------------------------------------------------------------|
| Empirical formula                           | C <sub>16</sub> H <sub>19</sub> NO <sub>2</sub>              | C <sub>32</sub> H <sub>38</sub> N <sub>5</sub> O <sub>13</sub> E<br>u | C <sub>32</sub> H <sub>38</sub> N <sub>5</sub> O <sub>13</sub> S<br>m | C <sub>32</sub> H <sub>38</sub> N <sub>5</sub> O <sub>13</sub> T<br>b | C <sub>32</sub> H <sub>38</sub> N <sub>5</sub> O <sub>13</sub><br>Dy | C <sub>32</sub> H <sub>38</sub> N <sub>5</sub> O <sub>13</sub><br>Gd |
| Formula weight                              | 257.32                                                       | 852.63                                                                | 852.63                                                                | 859.59                                                                | 859.59                                                               | 859.59                                                               |
| Crystal system, space group                 | Monoclinic,<br>P2 <sub>1</sub> /c                            | Monoclinic,<br>C2/c                                                   | Monoclinic,<br>C2/c                                                   | Monoclinic,<br>C2/c                                                   | Monoclinic,<br>C2/c                                                  | Monoclinic,<br>C2/c                                                  |
| a/Å                                         | 11.8139(10)                                                  | 14.5613(5)                                                            | 14.6306(4)                                                            | 14.5270(3)                                                            | 14.4892(6)                                                           | 14.5319(5)                                                           |
| b/Å                                         | 5.8067(4)                                                    | 11.6777(6)                                                            | 11.6855(3)                                                            | 11.6368(2)                                                            | 11.6159(4)                                                           | 11.6177(5)                                                           |
| c/Å                                         | 20.3464(13)                                                  | 20.3665(8)                                                            | 20.3367(5)                                                            | 20.4175(3)                                                            | 20.4562(8)                                                           | 20.4408(7)                                                           |
| β/°                                         | 100.245(4)                                                   | 93.018(2)                                                             | 93.0550(10)                                                           | 93.1040(10)                                                           | 93.116(2)                                                            | 93.279(3)                                                            |
| Volume/Å <sup>3</sup>                       | 1373.51(17)                                                  | 3458.4(3)                                                             | 3471.94(16)                                                           | 3446.47(11)                                                           | 3437.8(2)                                                            | 3445.3(2)                                                            |
| Z                                           | 4                                                            | 4                                                                     | 4                                                                     | 4                                                                     | 4                                                                    | 4                                                                    |
| ρ <sub>calc</sub> g/cm <sup>3</sup>         | 1.244                                                        | 1.638                                                                 | 1.628                                                                 | 1.657                                                                 | 1.668                                                                | 1.654                                                                |
| μ/mm <sup>-1</sup>                          | 0.082                                                        | 1.887                                                                 | 1.764                                                                 | 2.125                                                                 | 2.247                                                                | 1.998                                                                |
| Crystal size/mm                             | 0.13 × 0.05 ×<br>0.04                                        | 0.16 × 0.14 ×<br>0.05                                                 | 0.2 × 0.1 ×<br>0.08                                                   | 0.09 × 0.04 ×<br>0.02                                                 | 0.14 × 0.09 ×<br>0.02                                                | 0.15 × 0.11 ×<br>0.08                                                |
| 2θ range for data collection/°              | 4.07 – 63.05                                                 | 4.01 – 54.24                                                          | 4.46 – 66.30                                                          | 4.00 – 66.31                                                          | 4.50 – 63.02                                                         | 4.49 – 57.70                                                         |
| Index ranges                                | -17 ≤ h ≤ 17,<br>-8 ≤ k ≤ 8,<br>-29 ≤ l ≤ 29                 | -18 ≤ h ≤ 18,<br>-14 ≤ k ≤ 14,<br>-25 ≤ l ≤ 26                        | -22 ≤ h ≤ 22,<br>-17 ≤ k ≤ 17,<br>-31 ≤ l ≤ 30                        | -18 ≤ h ≤ 22,<br>-13 ≤ k ≤ 17,<br>-31 ≤ l ≤ 29                        | -21 ≤ h ≤ 21,<br>-17 ≤ k ≤ 16,<br>-27 ≤ l ≤ 30                       | -18 ≤ h ≤ 18,<br>-15 ≤ k ≤ 9,<br>-17 ≤ l ≤ 26                        |
| Reflections collected                       | 36346 / 4583                                                 | 26306 / 3801                                                          | 23929 / 6619                                                          | 22222 / 6564                                                          | 23349 / 5731                                                         | 7383 / 3995                                                          |
| Independent reflections                     | R <sub>int</sub> = 0.0778,<br>R <sub>sigma</sub> =<br>0.0432 | R <sub>int</sub> = 0.0666,<br>R <sub>sigma</sub> =<br>0.0417          | R <sub>int</sub> = 0.0291,<br>R <sub>sigma</sub> =<br>0.0284          | R <sub>int</sub> = 0.0402,<br>R <sub>sigma</sub> =<br>0.0435          | R <sub>int</sub> = 0.0467,<br>R <sub>sigma</sub> =<br>0.0448         | R <sub>int</sub> = 0.0178,<br>R <sub>sigma</sub> =<br>0.0296         |
| Restraints/parameters                       | 0 / 175                                                      | 0 / 235                                                               | 0 / 235                                                               | 0 / 235                                                               | 0 / 235                                                              | 0 / 235                                                              |
| Goodness-of-fit on F <sup>2</sup>           | 1.058                                                        | 1.041                                                                 | 1.041                                                                 | 1.044                                                                 | 1.044                                                                | 1.089                                                                |
| Final R indexes [I ≥ 2σ(I)]                 | R <sub>1</sub> = 0.0580,<br>wR <sub>2</sub> = 0.1356         | R <sub>1</sub> = 0.0275,<br>wR <sub>2</sub> = 0.0522                  | R <sub>1</sub> = 0.0204,<br>wR <sub>2</sub> = 0.0466                  | R <sub>1</sub> = 0.0273,<br>wR <sub>2</sub> = 0.0567                  | R <sub>1</sub> = 0.0276,<br>wR <sub>2</sub> = 0.0525                 | R <sub>1</sub> = 0.0251,<br>wR <sub>2</sub> = 0.0545                 |
| Final R indexes [all data]                  | R <sub>1</sub> = 0.0950,<br>wR <sub>2</sub> = 0.1604         | R <sub>1</sub> = 0.0321,<br>wR <sub>2</sub> = 0.0547                  | R <sub>1</sub> = 0.0228,<br>wR <sub>2</sub> = 0.0474                  | R <sub>1</sub> = 0.0318,<br>wR <sub>2</sub> = 0.0588                  | R <sub>1</sub> = 0.0330,<br>wR <sub>2</sub> = 0.0540                 | R <sub>1</sub> = 0.0271,<br>wR <sub>2</sub> = 0.0552                 |
| Largest diff. peak/hole / e/Å <sup>-3</sup> | 0.24 / -0.26                                                 | 0.51 / -0.47                                                          | 0.62 / -0.82                                                          | 0.64 / -0.54                                                          | 0.64 / -0.54                                                         | 0.64 / -0.54                                                         |
| CCDC                                        | 2370261                                                      | 2370259                                                               | 2370257                                                               | 2370256                                                               | 2370260                                                              | 2370258                                                              |

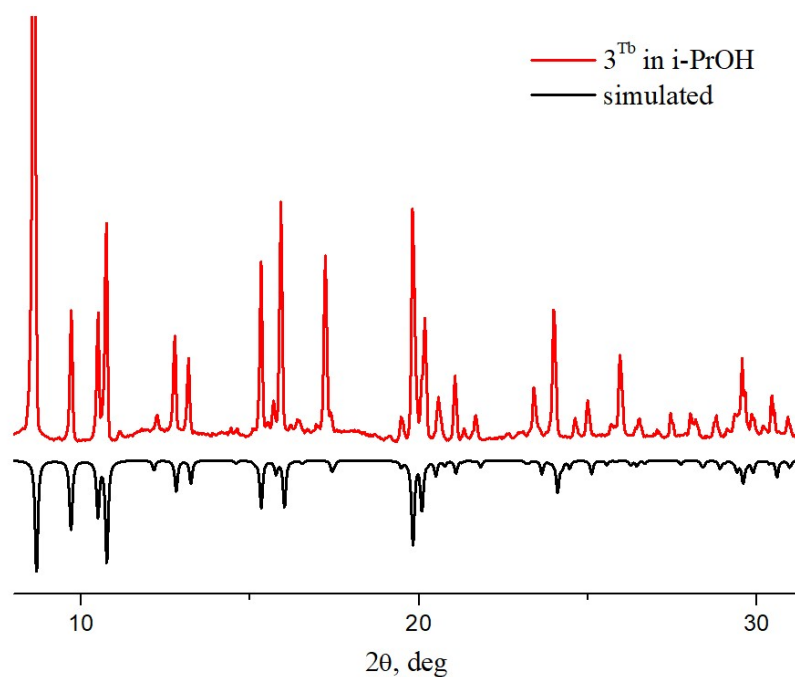

Figure S1. The experimental pattern for terbium complex  $3^{\text{Tb}}$  synthesized in isopropanol and the simulated one according to the single-crystal XRD analysis.

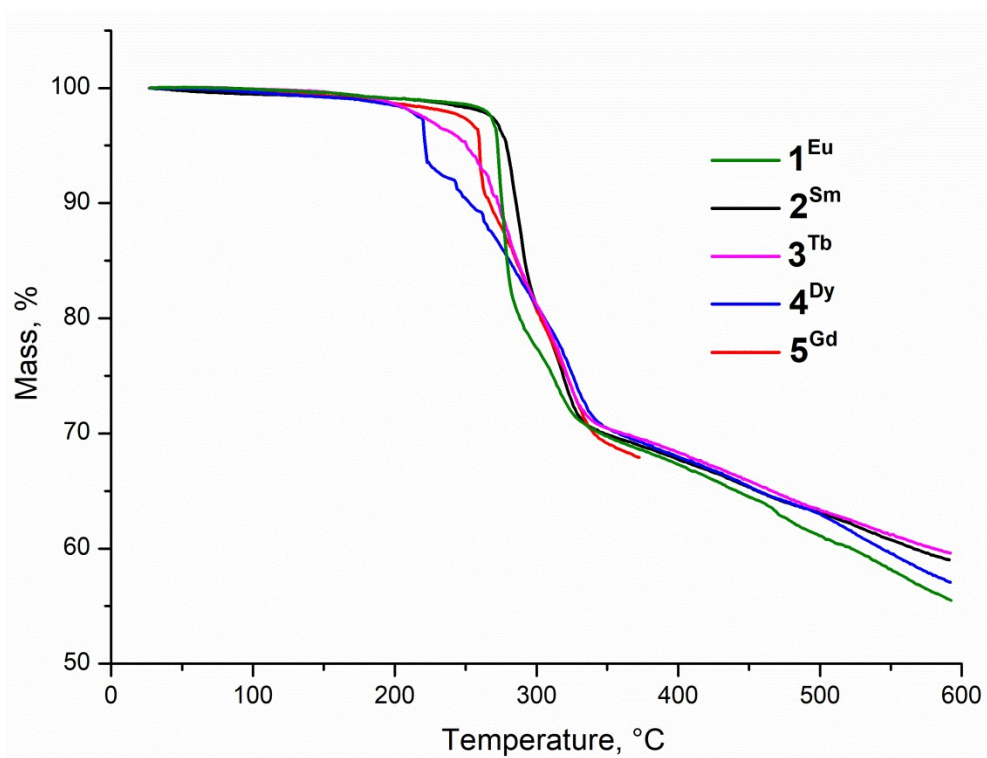

Figure S2. The thermogravimetric curves of obtained complexes.

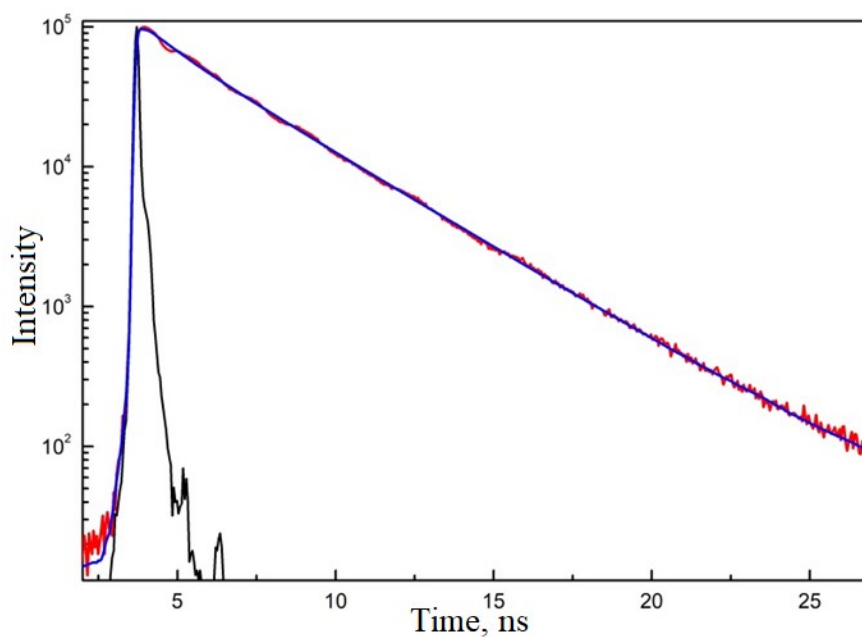

Figure S3. Photoluminescence kinetics curve of the ligand (red curve) and biexponential fit (blue curve) with lifetimes of 3.2 ns (80%) and 1.1 ns (20%). The black curve is the instrument response function ( $\lambda_{\text{ex}}=375$  nm and  $\lambda_{\text{em}}=470$  nm).

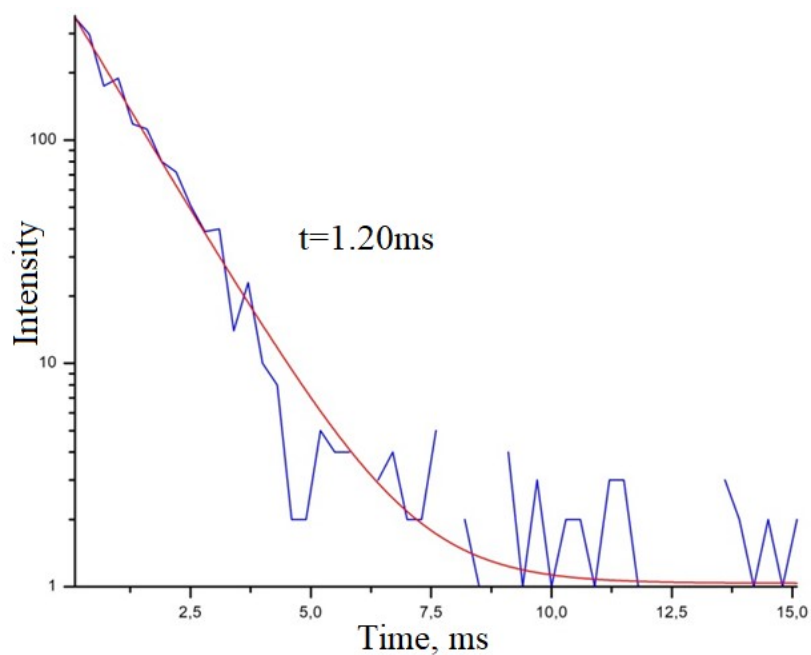

Figure S4. Photoluminescence kinetics curve of the europium(III) complex  $1^{\text{Eu}}$  ( $\lambda_{\text{ex}}=350$  nm and  $\lambda_{\text{em}}=613$  nm). The red line is an exponential approximation.

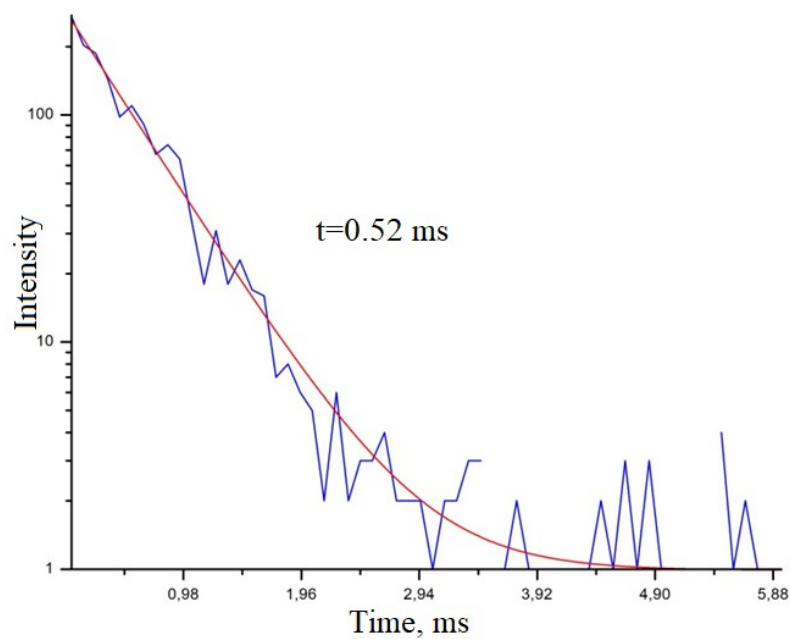

Figure S5. Photoluminescence kinetics curve of the terbium(III) complex  $3^{\text{Tb}}$  ( $\lambda_{\text{ex}}=280$  nm and  $\lambda_{\text{em}}=545$  nm). The red line is an exponential approximation.

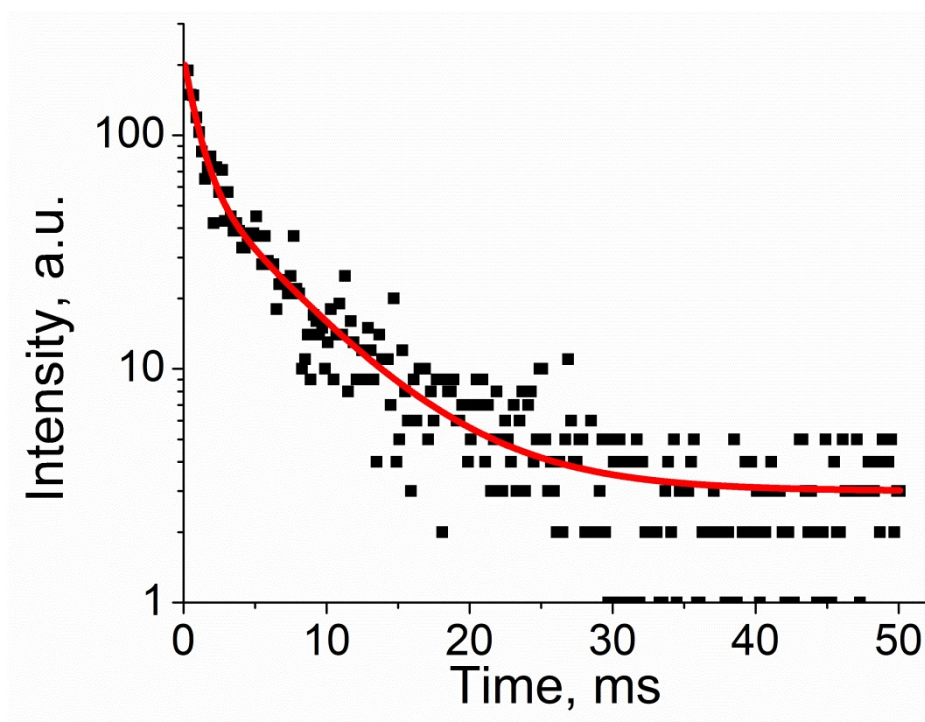

Figure S6. Photoluminescence kinetics curve of the gadolinium(III) complex  $5^{\text{Gd}}$  ( $\lambda_{\text{ex}}=390$  nm). The red line is an exponential approximation.

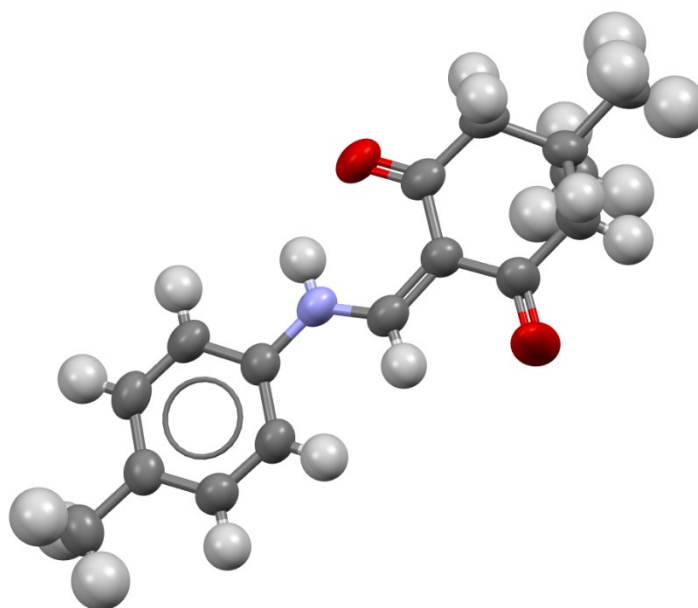

Figure S7. Structure of ligand with anisotropic displacement parameters depicted at 80% probability level.

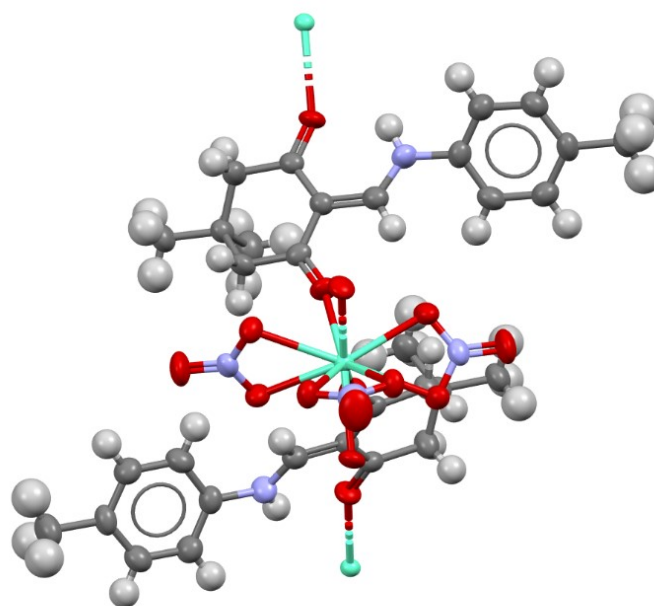

Figure S8. Structure of  $1^{Eu}$  with anisotropic displacement parameters depicted at 80% probability level.

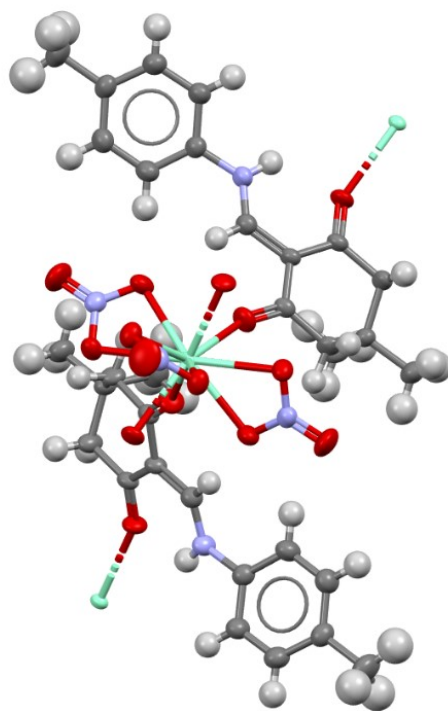

Figure S9. Structure of **2<sup>Sm</sup>** with anisotropic displacement parameters depicted at 80% probability level.

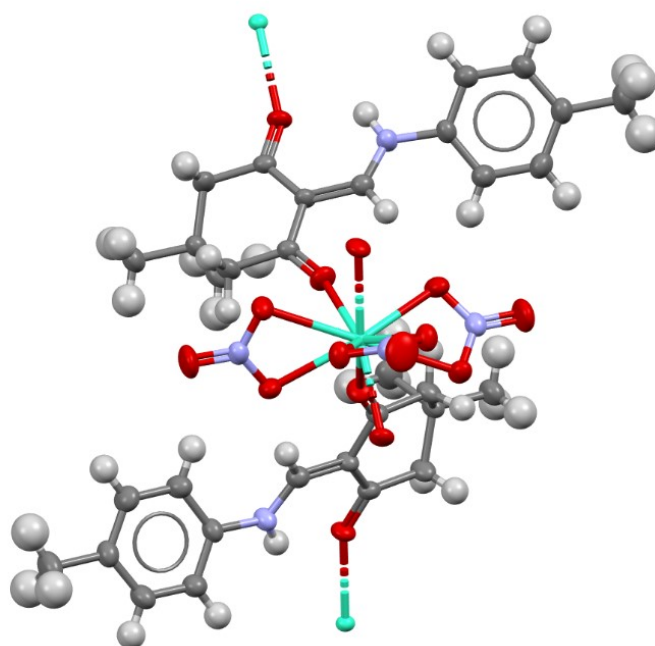

Figure S10. Structure of **3<sup>Tb</sup>** with anisotropic displacement parameters depicted at 80% probability level.

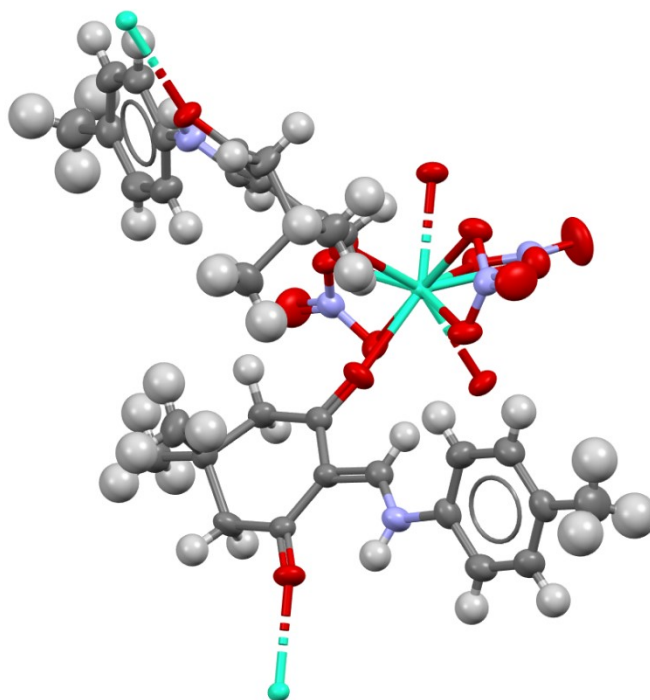

Figure S11. Structure of  $4^{\text{Dy}}$  with anisotropic displacement parameters depicted at 80% probability level.

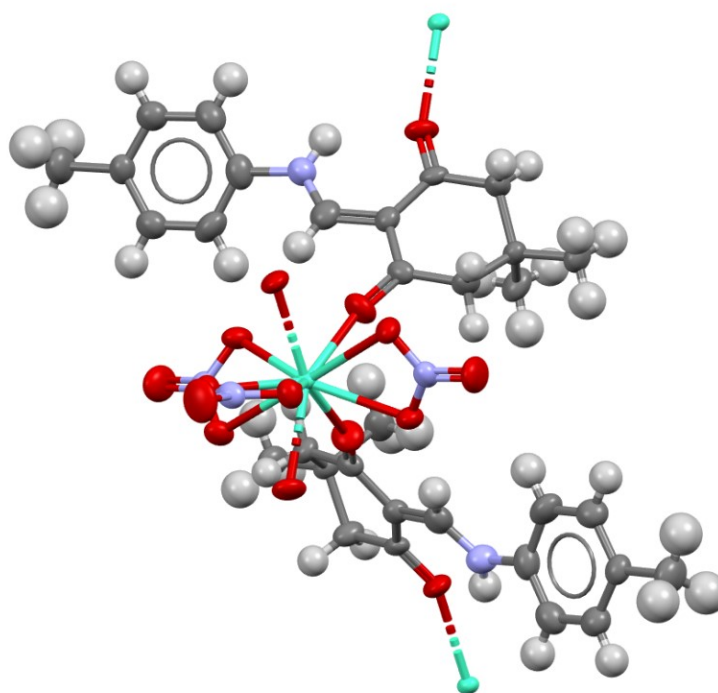

Figure S12. Structure of  $5^{\text{Gd}}$  with anisotropic displacement parameters depicted at 80% probability level.
